# Supplementary material
Source: PubMed Central journal article supplement (PMC4429765)

**A**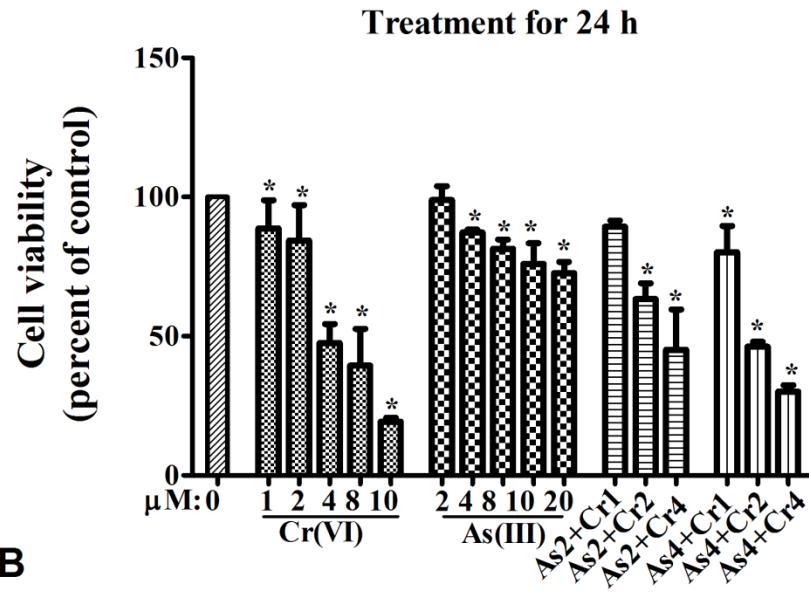**B**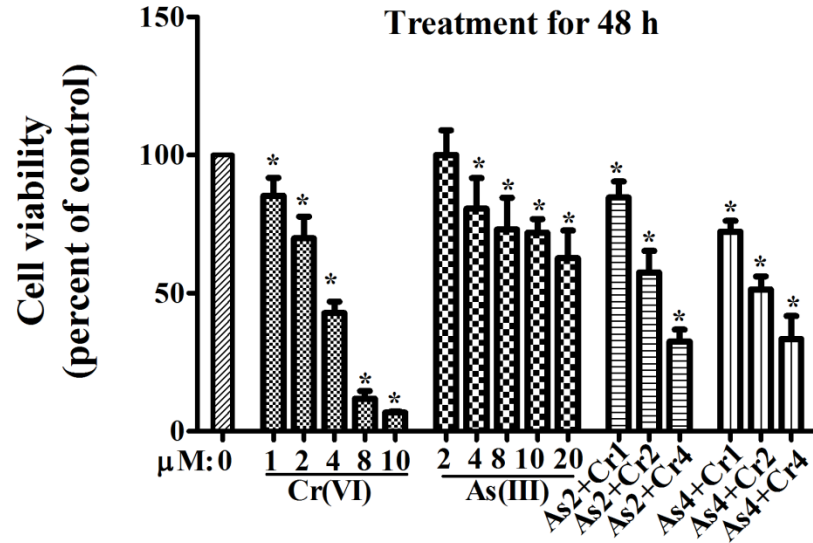**Supplemental data**

Supplement: NIHMS371693-supplement-02.pdf [file NIHMS371693-supplement-02.pdf]
